# Supplementary material for: Visible light responsive TiO2 photocatalysts for degradation of indoor acetaldehyde
Source: Royal Society of Chemistry journal article supplement (doi:10.1039/d0ra07567a), 2020-01-01
Supplement: d0ra07567a1.pdf [file d0ra07567a1.pdf]

Supplementary Information

# Visible Light Responsive TiO<sub>2</sub> Photocatalysts for Degradation of Indoor Acetaldehyde

*Suzuko Yamazaki\**, *Keisuke Kozasa*, *Kohshiro Okimura*, *Kensuke Honda*

Department of Chemistry, College of Science, Graduate School of Sciences and Technology for  
Innovation, Yamaguchi University, Yamaguchi 753-8512, Japan.

\*Corresponding author. Tel.: +81-83-933-5763, E-mail address: [yamazaki@yamaguchi-u.ac.jp](mailto:yamazaki@yamaguchi-u.ac.jp)

## Experimental

### Cleaning method of the dialysis tubing

The dialysis tubing (Spectra/Por<sup>®</sup> 3, molecular weight cut-off: 3500) was cut into 23 cm length and immersed into 1 L of an aqueous solution containing  $1.0 \times 10^{-3} \text{ mol dm}^{-3}$  ethylenediaminetetraacetic acid and 2% NaHCO<sub>3</sub> under stirring at 80°C for 30 min. After cooling to room temperature, it was washed thoroughly with water. Then, it was immersed in water under stirring at 80°C for 30 min followed by cooling and washing with water thoroughly.

Table S1. Amounts of metal ions used in the synthesis and those doped in the finally obtained samples.

| Additive amount (atom%) | Doped amount of metal ions (atom%) |        |        |         |        |       |        |       |        |         |
|-------------------------|------------------------------------|--------|--------|---------|--------|-------|--------|-------|--------|---------|
|                         | Cr(III)                            | Pt(IV) | V(III) | Fe(III) | Cu(II) | Nb(V) | Mo(VI) | W(VI) | Mn(II) | Ru(III) |
| 0.10                    |                                    | 0.10   |        | 0.10    |        |       |        |       | 0.01   |         |
| 0.20                    | 0.20                               |        |        |         | 0.11   |       |        |       |        |         |
| 0.30                    |                                    |        | 0.30   |         |        |       |        |       |        |         |
| 0.50                    | 0.50                               | 0.50   | 0.50   | 0.50    | 0.23   | 0.50  | 0.50   | 0.50  | 0.20   | 0.42    |
| 0.80                    | 0.80                               |        |        |         |        |       |        |       |        |         |
| 1.0                     |                                    | 1.0    | 1.0    | 1.0     | 0.35   | 1.0   | 1.0    | 1.0   | 0.30   | 0.90    |
| 2.0                     | 1.7                                | 1.9    | 1.8    |         | 0.70   | 1.0   |        |       | 0.47   | 1.8     |
| 5.0                     | 2.9                                |        |        |         |        |       |        |       |        |         |
| 10                      | 4.2                                |        |        |         |        |       |        |       |        |         |

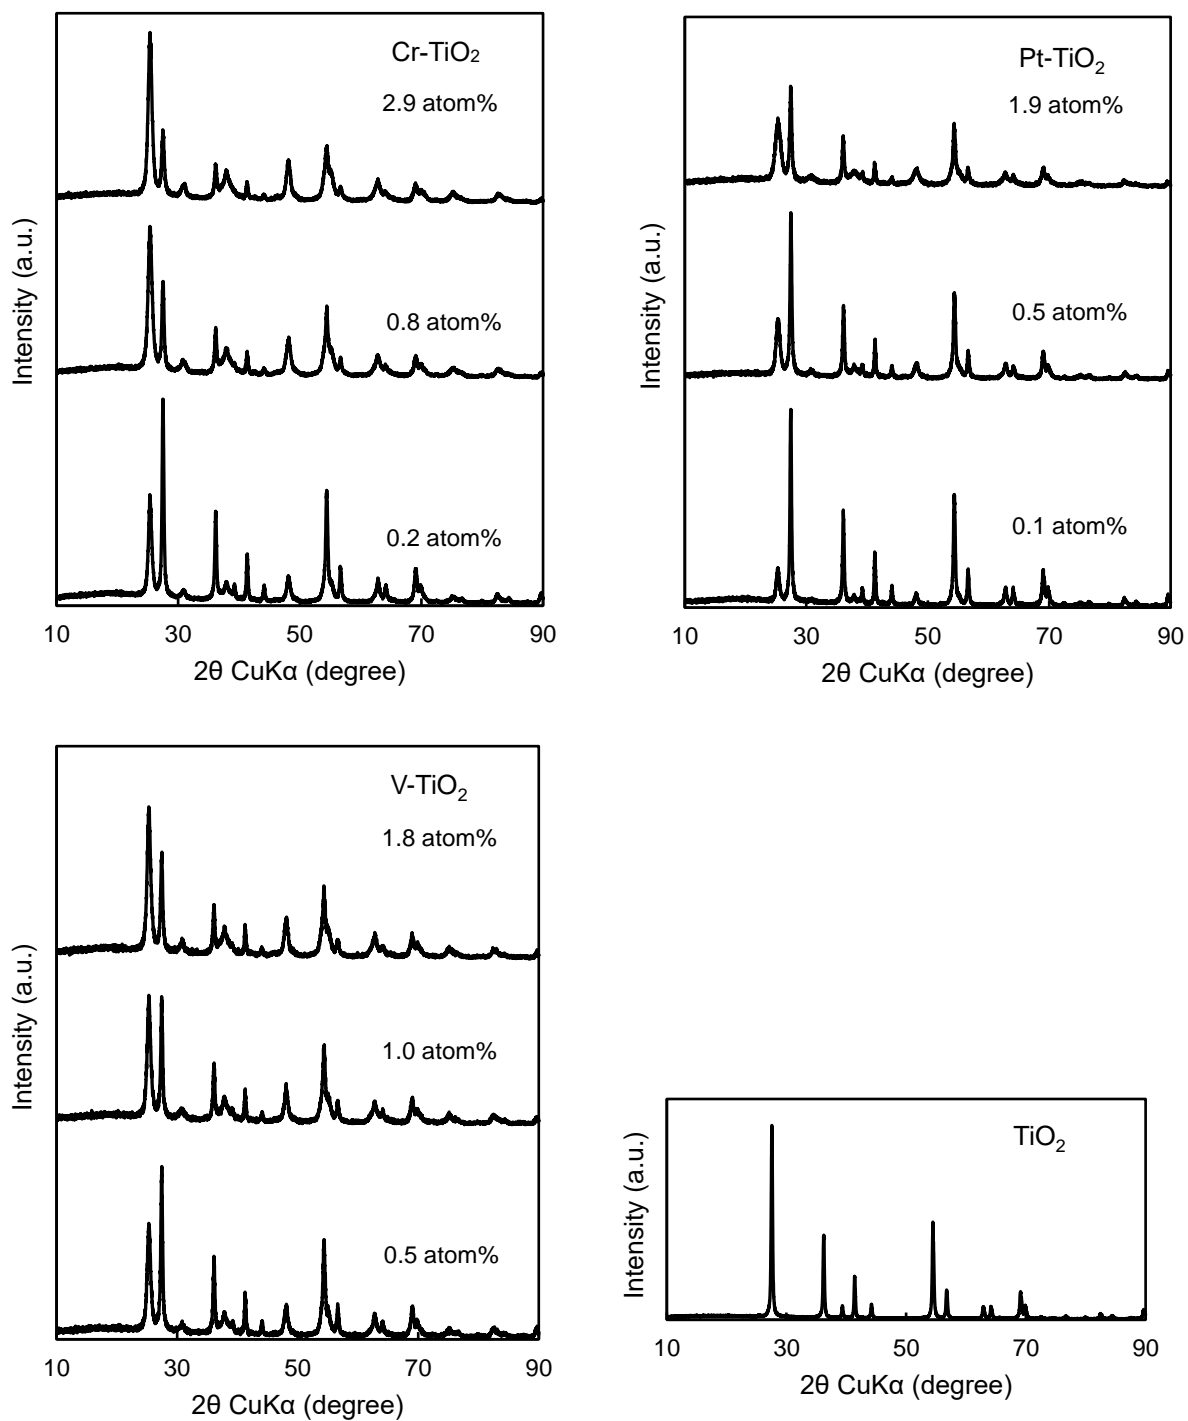

Figure S1. XRD patterns of Cr-TiO<sub>2</sub>, Pt-TiO<sub>2</sub>, V-TiO<sub>2</sub> and TiO<sub>2</sub> powder sintered at 500 °C.

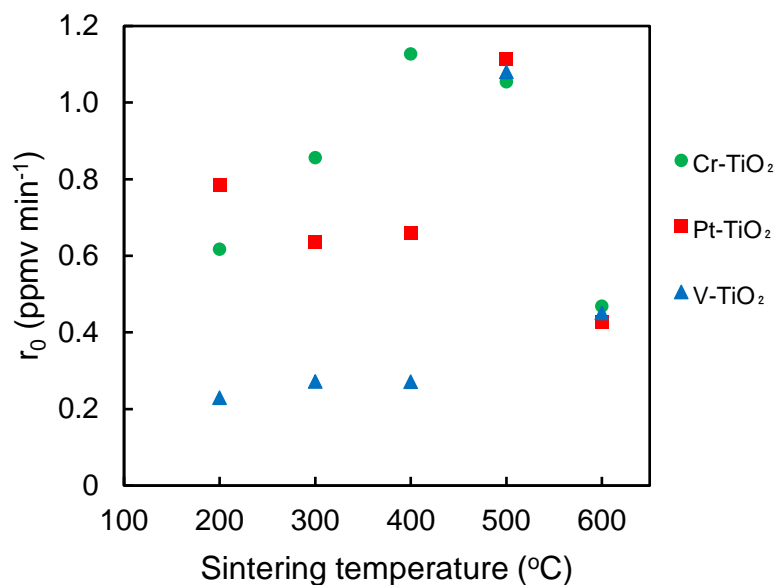

Figure S2. Effect of sintering temperature on the  $r_0$  values for 0.8 atom% Cr-TiO<sub>2</sub>, 0.1 atom% Pt-TiO<sub>2</sub>, and 1.0 atom% V-TiO<sub>2</sub>.

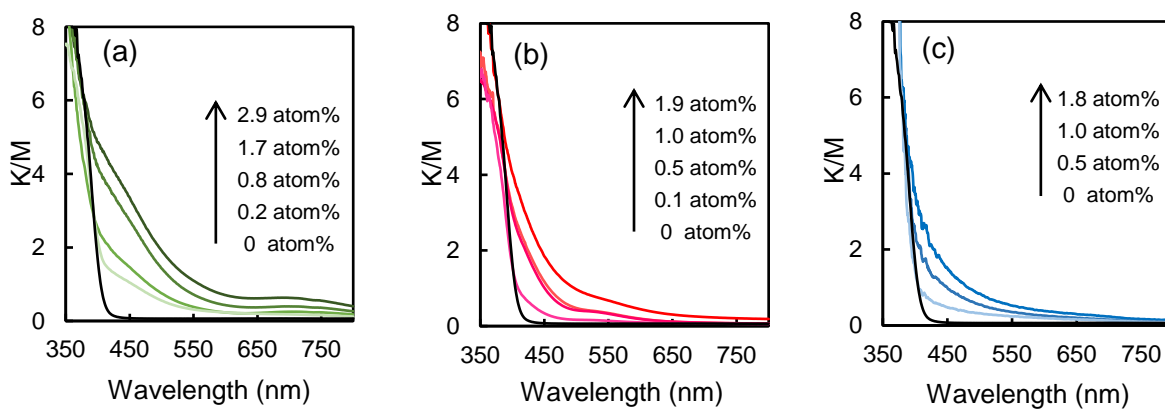

Figure S3. UV-vis diffuse reflectance spectra of (a) Cr-TiO<sub>2</sub>, (b) Pt-TiO<sub>2</sub>, and (c) V-TiO<sub>2</sub> powder sintered at 500 °C. Black line (0 atom%) shows the spectra of TiO<sub>2</sub>.

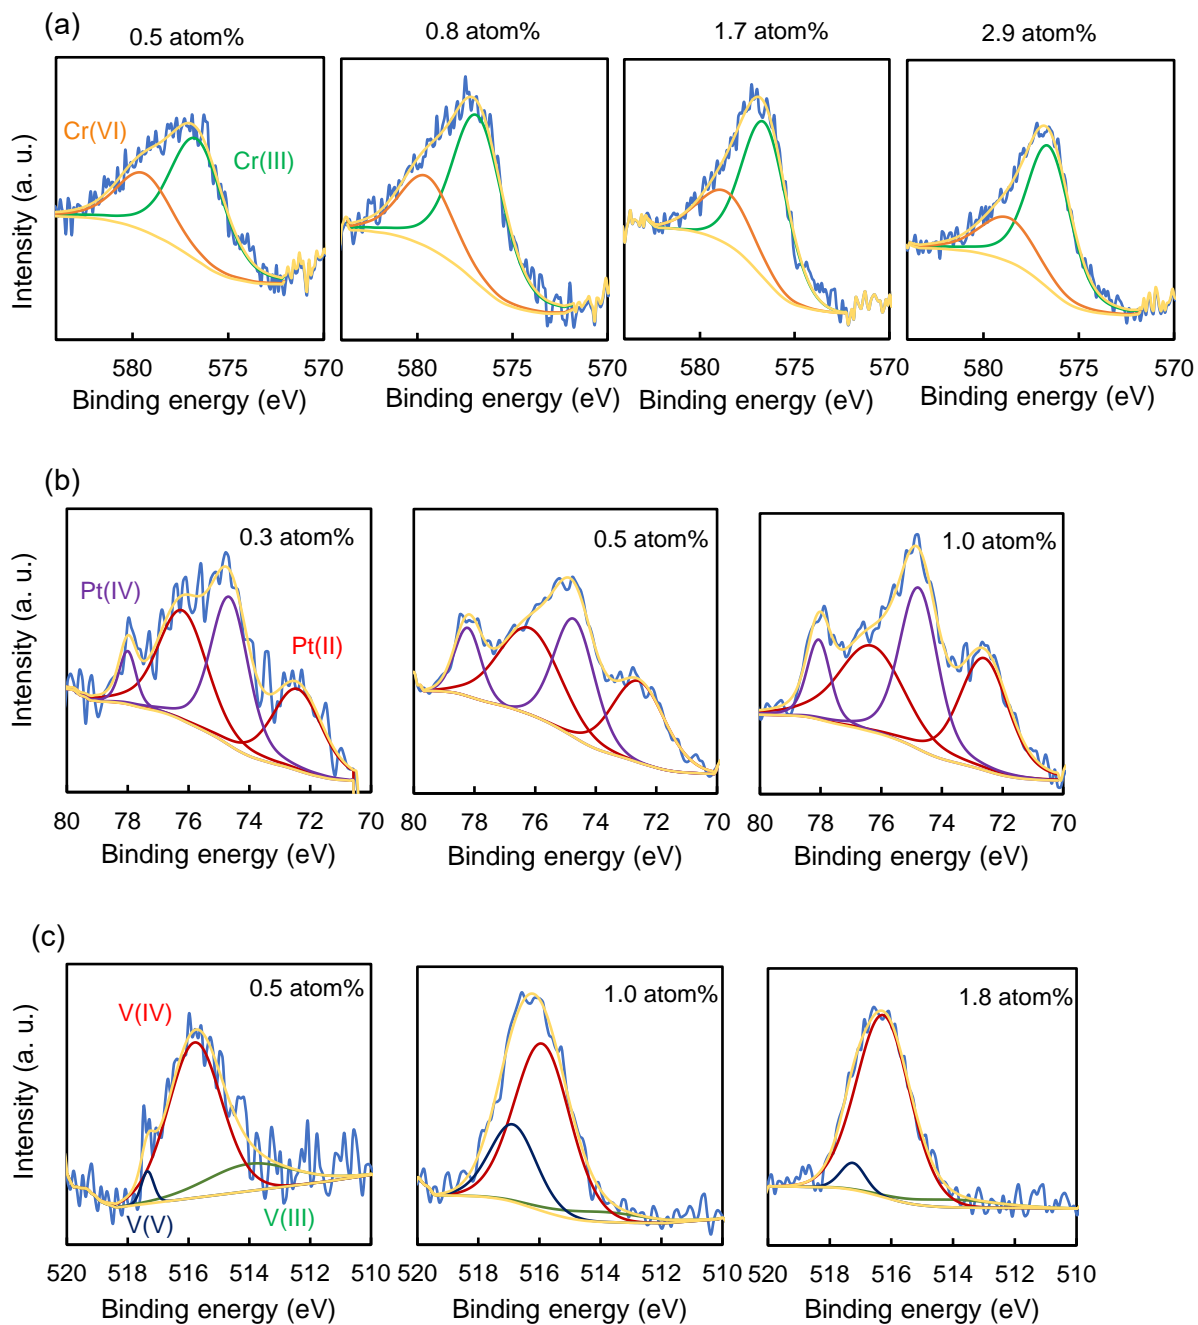

Figure S4. XPS spectra of (a) Cr-TiO<sub>2</sub>, (b) Pt-TiO<sub>2</sub>, and (c) V-TiO<sub>2</sub> powder sintered at 500°C.

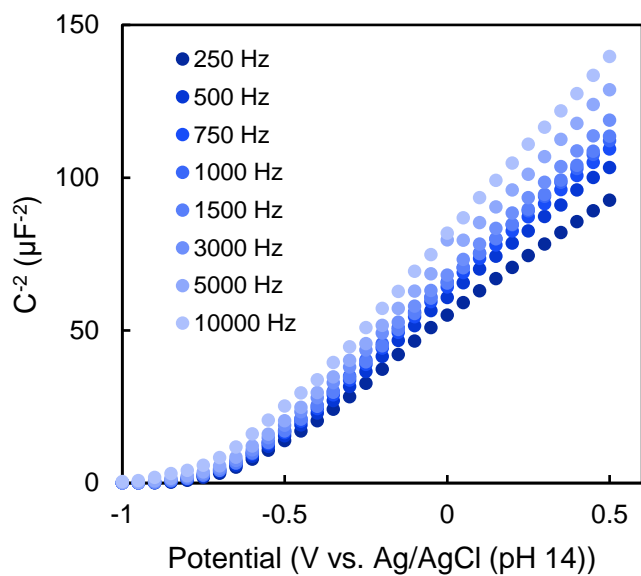

Figure S5. Mott-Schottky plots of TiO<sub>2</sub>-DC film at different frequencies (250 – 10000 Hz).

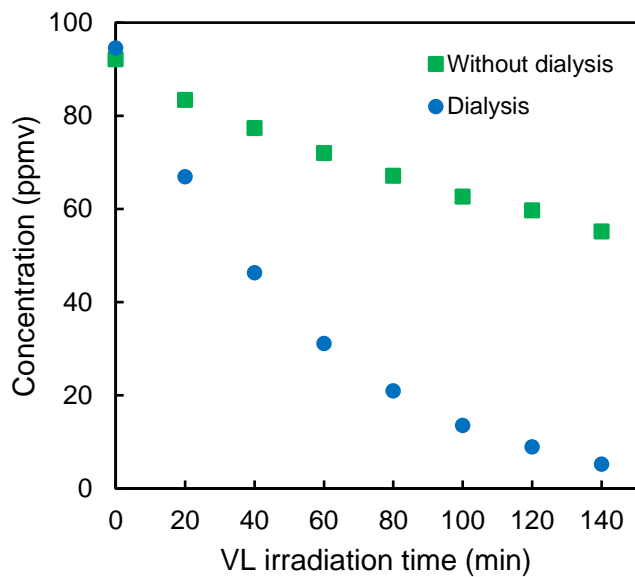

Figure S6. Photocatalytic degradation of CH<sub>3</sub>CHO on 0.8 atom% Cr-TiO<sub>2</sub> synthesized with and without dialysis.

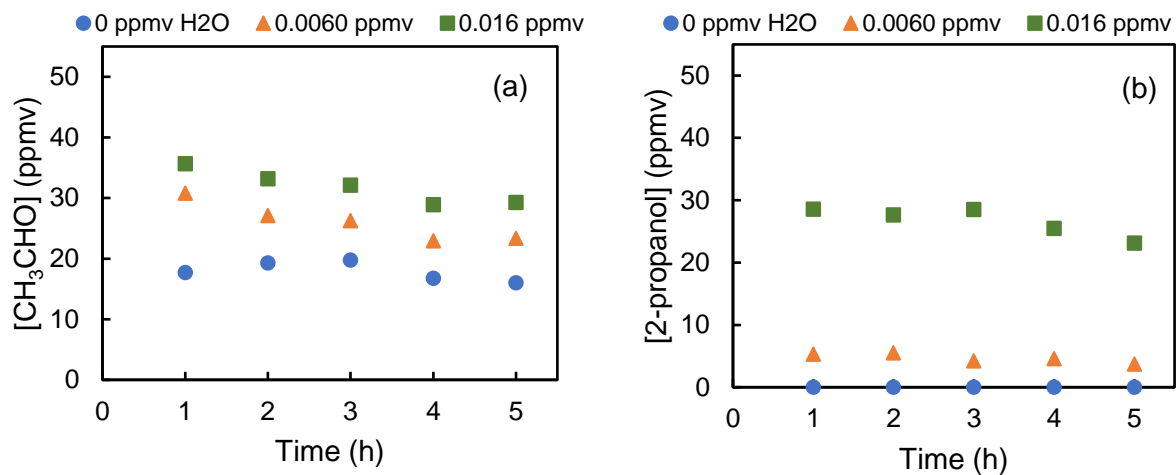

Figure S7. Time course of the concentrations of (a) CH<sub>3</sub>CHO and (b) 2-propanol in the reaction vessel containing 0.8 atom% Cr-TiO<sub>2</sub> and various amounts of water vapor.
